# Supplementary material
Source: MDPI journal article supplement (https://www.mdpi.com/2073-4433/13/5/696)
Supplement: s1 [file s1]

# Supplementary Materials: A Deep Learning Approach for Meter-Scale Air Quality Estimation in Urban Environments Using Very High-Spatial-Resolution Satellite Imagery

Meytar Sorek-Hamer <sup>1,2,\*</sup>, Michael Von Pohle <sup>1,2</sup>, Adwait Sahasrabhojane <sup>1,2</sup>, Ata Akbari Asanjan <sup>1,2</sup>, Emily Deardorff <sup>1,2</sup>, Esra Suel <sup>3</sup>, Violet Lingenfelter <sup>1,2</sup>, Kamalika Das <sup>1,2</sup>, Nikunj C. Oza <sup>2</sup>, Majid Ezzati <sup>3</sup> and Michael Brauer <sup>4</sup>

<sup>1</sup> Universities Space Research Association (USRA), Mountain View, CA 94035, USA; michael.vonpohle@nasa.gov (M.V.P.); adwait.sahasrabhojane@nasa.gov (A.S.); aakbariasanjan@usra.edu (A.A.A.); emily.deardorff@gmail.com (E.D.); vlingenfelter5@gmail.com (V.L.); kamalika.das@gmail.com (K.D.)

<sup>2</sup> NASA Ames Research Center, Moffett field, CA 94035, USA; nikunj.c.oza@nasa.gov

<sup>3</sup> Global Environmental Health Research Group, School of Public Health, Imperial College, London SW7 2BX, UK; esra.suel@imperial.ac.uk (E.S.); majid.ezzati@imperial.ac.uk (M.E.)

<sup>4</sup> School of Population and Public Health (SPPH), University of British Columbia, Vancouver, BC V6T 1Z3, Canada; michael.brauer@ubc.ca

\* Correspondence: msorekhamer@usra.edu

## 1. Deep Learning Model Architecture

The implemented deep learning model (introduced in the ‘Methodology’ section) contains three blocks of two consecutive convolutional layers followed by a Max Pooling layer. The three blocks are followed by a block of three convolutional layers and a batch normalization layer. Finally, a series of data flattening, dense layer, batch normalization, and two dense layers will route the feature data into continuous PM<sub>2.5</sub> and NO<sub>2</sub> levels (Figure S1). Adapted from VGG16, we used rectified linear unit (ReLU) activations for all the convolutional and dense layers except the last dense layer. The chosen optimizer for training was Adam [1] with a 0.001 and 0.9 learning rate and momentum, respectively. Sufficient number of epochs have been used for training the model, and we ensured that the model converges without overfitting. The model was implemented in Python using Keras (<https://keras.io/>, accessed on 2 March 2022) and Tensorflow (<https://tensorflow.org/>, accessed on 2 March 2022) libraries.

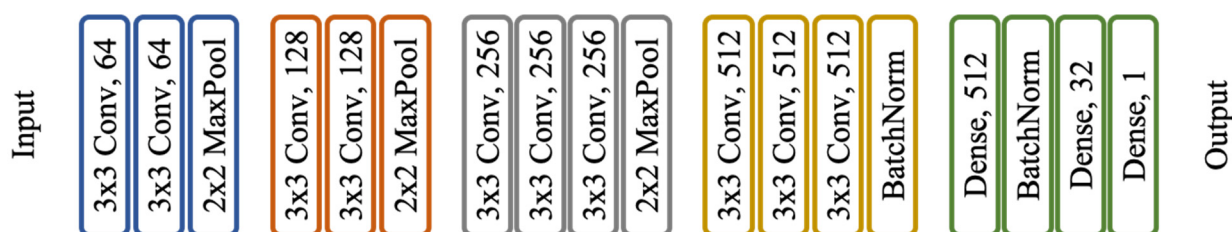

**Figure S1.** Deep Learning Model Architecture The proposed model used for estimating PM<sub>2.5</sub> and NO<sub>2</sub> annual concentrations The model is a modified version of VGG16 and contains 4 blocks of convolutional layers (color-coded from top block to the fourth block), and a block of dense layers following the convolutional blocks to estimate the air quality values. For the convolutional layers, the kernel sizes are indicated first, following by the number of features. The reported numbers for Max Pooling and dense layers are the pool size and number of hidden nodes, respectively. Inputs of this model are the visual bands from WorldView satellites at 100 m and 200 m resolutions for PM<sub>2.5</sub> and NO<sub>2</sub>, respectively. The outputs are the corresponding concentrations for PM<sub>2.5</sub> and NO<sub>2</sub>.

## 2. Variables Used in Land Use Regression (LUR) Models

The following table lists the major variables used to develop LUR models with a European LUR model as an example [2]:

**Table S1.** Common variables used in LUR models.

|                                                                                                                                                                                                                                                                                                                                                                                                                                                                                                                                                              |  |
|--------------------------------------------------------------------------------------------------------------------------------------------------------------------------------------------------------------------------------------------------------------------------------------------------------------------------------------------------------------------------------------------------------------------------------------------------------------------------------------------------------------------------------------------------------------|--|
| <b>(1) Air pollution monitoring data</b>                                                                                                                                                                                                                                                                                                                                                                                                                                                                                                                     |  |
| <ul style="list-style-type: none"> <li>• ESCAPE annual mean concentrations for 2009-2010 for NO<sub>2</sub> and PM<sub>2.5</sub>.</li> <li>• Annual mean concentrations for PM<sub>2.5</sub> and NO<sub>2</sub> for 2010 were also derived from the AIRBASE v8 dataset.</li> </ul>                                                                                                                                                                                                                                                                           |  |
| <b>(2) Satellite derived air pollution estimates</b>                                                                                                                                                                                                                                                                                                                                                                                                                                                                                                         |  |
| <ul style="list-style-type: none"> <li>• Satellite derived (SAT) estimates of PM<sub>2.5</sub> extracted from the global datasets reported in [3] at 10km resolution.</li> <li>• For NO<sub>2</sub>, SAT estimates were obtained from the tropospheric NO<sub>2</sub> columns measured with the OMI (Ozone Monitoring Instrument) on board the Aura satellite and were related to ground-level concentrations using global GEOS-Chem model, producing an annual gridded NO<sub>2</sub> surface for the year 2010 at a 10km resolution.</li> </ul>            |  |
| <b>(3) Chemical transport model estimates</b>                                                                                                                                                                                                                                                                                                                                                                                                                                                                                                                |  |
| <ul style="list-style-type: none"> <li>• Long range chemical transport model (CTM) estimates for PM<sub>2.5</sub> and NO<sub>2</sub> were derived from the MACC-II ENSEMBLE model, for the year 2010 at 0.1° x 0.1° (~10km) resolution.</li> </ul>                                                                                                                                                                                                                                                                                                           |  |
| <b>(4) GIS predictor variables</b>                                                                                                                                                                                                                                                                                                                                                                                                                                                                                                                           |  |
| <ul style="list-style-type: none"> <li>• A spatial moving window summation function (focalsum in ArcGIS10) was used to calculate the local predictor variables (e.g., length of road and areas of different land covers) for selected distances. <ul style="list-style-type: none"> <li>○ Road data originated from the 1:10,000 EuroStreets digital road network (version 3.1, based on TeleAtlas MultiNet TM for year-2008).</li> <li>○ Corine Land Use</li> <li>○ Elevation data from SRTM Digital Elevation Database version 4.1.</li> </ul> </li> </ul> |  |

### 3. Visible Infrared Imaging Radiometer Suite (VIIRS) Night-Time Light Imagery

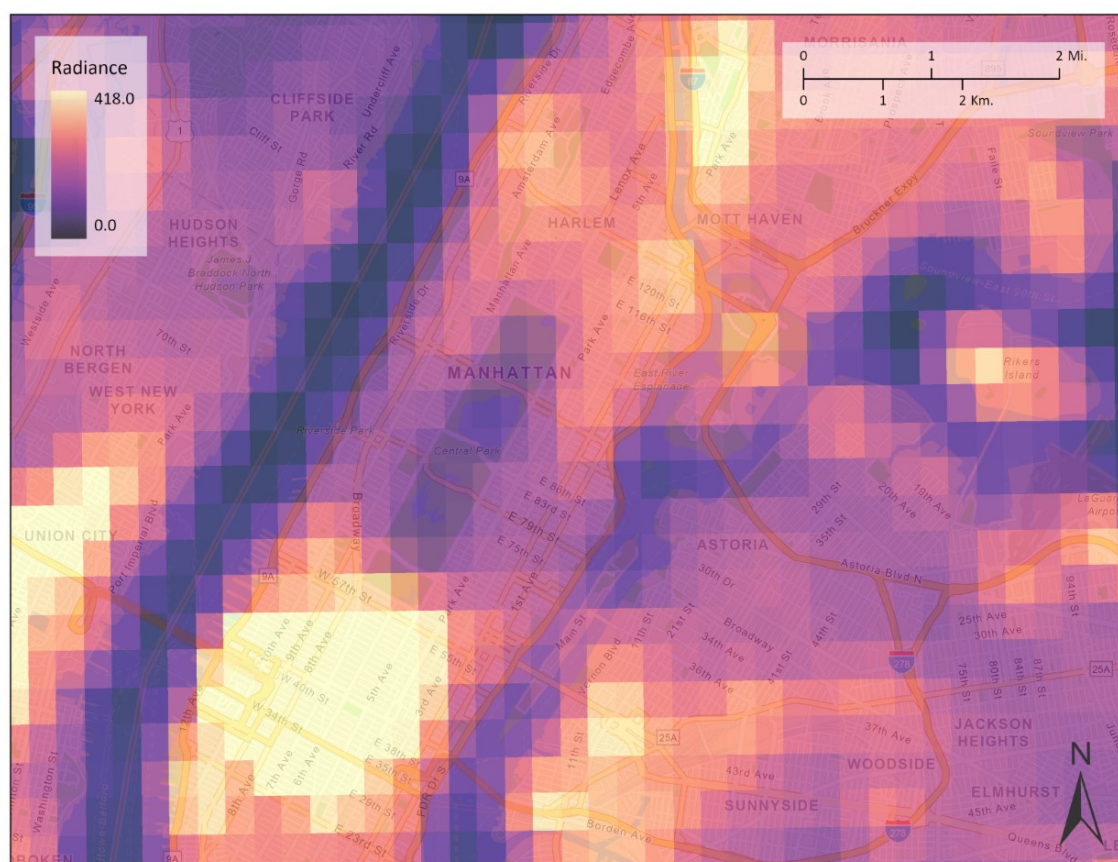

**Figure S2.** VIIRS Night-Time Light over Manhattan. Night-time light data highlights areas of high urban activity, like the ones around Central Park (Reproduced from ESRI (2018) [4]. © Open-StreetMap contributors).

## References

1. Kingma, Diederik P. and Ba, Jimmy **2015** Adam: A Method for Stochastic Optimization. *ICLR*. May 7-9, 2015, San Diego, CA, <https://doi.org/10.48550/arxiv.1412.6980>.
2. de Hoogh K, Gulliver J, Donkelaar A van, Martin R V, et al. **2016** Development of West-European PM<sub>2.5</sub> and NO<sub>2</sub> land use regression models incorporating satellite-derived and chemical transport modelling data. *Environ. Res.* **151** 1–10
3. van Donkelaar A, Martin R V, Brauer M, Hsu N C, Kahn R A, Levy R C, Lyapustin A, Sayer A M and Winker D M **2016** Global Estimates of Fine Particulate Matter using a Combined Geophysical-Statistical Method with Information from Satellites, Models, and Monitors. *Environ. Sci. Technol.* **50** 3762–3772
4. ESRI **2018**. Open Street Map (OSM), <https://www.esri.com/arcgis-blog/products/arcgis-living-atlas/mapping/new-osm-vector-basemap/>, Accessed: 7/1/2020.
